# Supplementary material
Source: PubMed Central journal article supplement (PMC3118451)

# Supplementary data

Urgard et al.,

## *Supplemental Method: qRT-PCR*

All primers used in this study were designed with the Primer3 program ([http://frodo.wi.mit.edu/cgi-bin/primer3/primer3\\_www.cgi](http://frodo.wi.mit.edu/cgi-bin/primer3/primer3_www.cgi)) and tested for specificity with NCBI's BLASTs (<http://blast.ncbi.nlm.nih.gov/Blast.cgi>) to verify that the binding sites were unique for each gene. All primers were ordered from Metabion International (Martinsried, Germany). The size of all targeted genes' amplicon sequence was about 300bp and cross at least one boundary of exon and intron (Table 2).

**Real time quantitative RT-PCR.** First strand cDNA was synthesized using an oligo-(dT)15 primer and Moloney murine leukemia virus reverse transcriptase (Fermentas, Vilnius, Lithuania) at 42°C for 1 h. The real-time quantitative RT-PCR was carried out using 7900HT Fast Real-Time PCR System (Applied Biosystems) according to the manufacturer's instructions. The protocol of Relative Quantification ( $2^{-\Delta\Delta Ct}$ ) was applied. The thermal cycling program consisted of 2 min at 50 °C, 10 min at 95 °C, followed by 40 cycles of 15 second at 95°C and 60 °C for 1 min. The qRT-PCR was performed using SYBR green PCR master mix (Fermentas, Vilnius, Lithuania) with 25 ng cDNA as template, 0.2µM of final oligos concentration. Real time qPCR was monitored and analyzed by the Sequence Detection System version 2.2.2 (PE Applied Biosystems, California, USA). The reactions were run in triplicate for each sample. Endogenous control gene had the mean cycle threshold (Ct) values as low as 14.6 and a constant expression level in normal lung tissue and tumors. The dissociation curves for all reactions were verified to display a single peak.

## Supplemental tables

**Table 1. Patients and tumor characteristics**

| Category              | Cases /histology |     |                            | NL         |
|-----------------------|------------------|-----|----------------------------|------------|
|                       | total (N=85)     | SCC | BA(AC+BC)                  |            |
| Median (range) of age | 68 (38~81)       |     | 69 (44~81)<br>64 (38~79)   | 70 (53~79) |
| Gender                |                  |     |                            |            |
| Male                  | 76 (89.41%)      |     | 61 (71.7%)<br>15(17.64%)   | 20         |
| Female                | 9 (10.58%)       |     | 1 (1.17%)<br>8 (9.41%)     | 1          |
| Tobacco use           |                  |     |                            |            |
| >50 packages/year     | 26               |     | 24<br>7                    |            |
| 35 packages/year      | 52               |     | 40<br>12                   | 10         |
| <5 packages/year      | 2                |     | 2<br>0                     | 11         |
| non                   | 5                |     | 1<br>4                     |            |
| Cancer TNM stage:     |                  |     |                            |            |
| Ia                    | 13 (15.29%)      |     | 8 (9.41%)<br>5 (5.88%)     |            |
| Ib                    | 46 (54.11%)      |     | 36 (42.35%)<br>10 (11.76%) |            |
| IIa                   | 3 (3.52%)        |     | 2 (2.35%)<br>1 (1.17%)     |            |
| IIb                   | 3 (3.52%)        |     | 2 (2.35%)<br>1 (1.17%)     |            |
| IIIa                  | 9 (10.58%)       |     | 6 (7.05%)<br>3 (3.52%)     |            |
| IIIb                  | 6 (7.05%)        |     | 4 (4.70%)<br>2 (2.35%)     |            |
| IV                    | 5 (5.88%)        |     | 4 (4.70%)<br>1 (1.17%)     |            |

**Table 2 Oligos for validation of microarray gene expression by qRT-PCR. Accession number for a given gene is shown in parenthesis. (F: forward oligo, R: reverse oligo)**

| <b>Up-regulated genes</b>     |                                                              |                                                           |
|-------------------------------|--------------------------------------------------------------|-----------------------------------------------------------|
| CCNB2<br>(NM_004701.2)        | Cyclin B2                                                    | F, 5' actgctctgctcttgcttc<br>R, 5' ctggatttgggaactggta    |
| TTK<br>(NM_003318.3)          | Dual specificity protein kinase                              | F, 5' cagcagcaacagcatcaaat<br>R, 5' ttgcttgaacctcacttcc   |
| BUB1B<br>(AF107297)           | Budding uninhibited by benzimidazoles 1 homolog beta (yeast) | F, 5' ctctgggcaatacagcttca<br>R, 5' ccaggcttctggtgcttag   |
| PTTG2<br>(NP_006598.1)        | Pituitary tumor-transforming 2                               | F, 5' ctgcctcatgacgcttat<br>R, 5' gagaggcactccactcaagg    |
| <b>Down-regulated genes</b>   |                                                              |                                                           |
| CLIC5<br>(AF216941)           | Chloride intracellular channel protein 5                     | F, 5' gtctggcaaacacagcttca<br>R, 5' ggcaactgcaacaaactgaga |
| GPR116<br>(NM_015234)         | G-protein coupled receptor 116                               | F, 5' cagaagctatgccggttctc<br>R, 5' agccatctggagcagactgt  |
| AGER (RAGE)<br>(NP_001127.1)  | Advanced glycosylation end product-specific receptor         | F, 5' cgtcccacttctcctgtag<br>R, 5' gctactgctccacttctgg    |
| TNNC1<br>(NM_001002862.1)     | Troponin C type 1                                            | F, 5' atcgaggagctcatgaagga<br>R, 5' ctgggtgaaggctcagcatc  |
| <b>Internal control genes</b> |                                                              |                                                           |
| ESD<br>(M13450)               | Esterase D/formylglutathione hydrolase                       | F, 5' atttgctccaatttgaacc<br>R, 5' tcacaagggtggtagcatca   |

**Table 3 Genes down-regulated and up-regulated in NSCLC.****Genes down-regulated in NSCLC**

| <b>Gene ID</b> | <b>adj. p-value</b> | <b>Fold change</b> |
|----------------|---------------------|--------------------|
| SFTPC          | 7,13E-10            | 24,43              |
| FCN3           | 6,77E-17            | 16,71              |
| FABP4          | 3,28E-14            | 13,54              |
| C19ORF59       | 5,43E-20            | 12,51              |
| TMEM100        | 1,65E-21            | 12,11              |
| CYP4B1         | 1,35E-12            | 11,41              |
| CLIC5          | 9,37E-21            | 10,99              |
| SFTPD          | 4,18E-08            | 10,75              |
| SFTA2_HUMAN    | 4,02E-07            | 10,59              |
| CLEC3B         | 9,66E-22            | 10,23              |
| GKN2           | 1,50E-19            | 9,83               |
| SCGB1A1        | 1,23E-07            | 9,65               |
| SFTPA1B        | 7,00E-15            | 9,51               |
| MAMDC2         | 9,55E-17            | 9,19               |
| CPB2           | 2,75E-20            | 9,04               |
| AGER           | 4,14E-24            | 8,85               |
| INMT           | 1,51E-15            | 8,71               |
| FAM107A        | 1,41E-20            | 8,61               |
| CLDN18         | 7,11E-23            | 8,17               |
| FHL1           | 6,23E-18            | 7,95               |
| ADH1A          | 9,67E-09            | 7,57               |
| MARCO          | 6,55E-12            | 7,43               |
| SCGB3A2        | 2,63E-07            | 7,36               |
| BTNL9          | 6,09E-23            | 7,33               |
| LPL            | 1,82E-16            | 7,23               |
| HPGD           | 3,12E-13            | 7,09               |
| TNNC1          | 3,91E-20            | 6,72               |
| SUSD2          | 4,05E-11            | 6,64               |
| HBA2           | 8,44E-11            | 6,60               |
| C4BPA          | 5,08E-06            | 6,59               |
| ABCA3          | 1,50E-08            | 6,56               |
| PGC            | 8,11E-07            | 6,23               |
| PDK4           | 5,06E-14            | 6,14               |
| FMO2           | 7,06E-16            | 6,07               |
| SCGB3A1        | 3,20E-05            | 5,96               |
| FOLR1          | 9,50E-07            | 5,95               |
| AQP4           | 3,21E-14            | 5,93               |
| LAMP3          | 1,17E-11            | 5,93               |
| MRC1L1         | 5,14E-13            | 5,83               |
| CP21A_HUMAN    | 3,89E-14            | 5,79               |
| OLR1           | 6,82E-13            | 5,78               |
| C10ORF116      | 7,70E-13            | 5,75               |
| OGN            | 1,10E-10            | 5,67               |
| C7             | 8,25E-08            | 5,64               |
| PEBPL_HUMAN    | 3,83E-14            | 5,51               |
| ADH1C          | 8,00E-07            | 5,45               |
| FBP1           | 8,13E-11            | 5,39               |
| HSD17B6        | 2,10E-15            | 5,35               |
| NP_689672,3    | 1,36E-07            | 5,34               |
| TEK            | 5,80E-21            | 5,21               |

|              |          |      |
|--------------|----------|------|
| GPR116       | 5,05E-15 | 5,19 |
| HBD          | 3,05E-11 | 5,15 |
| ABCA8        | 1,51E-16 | 5,14 |
| Q8N8N9_HUMAN | 1,94E-21 | 5,11 |
| VIPR1        | 7,67E-18 | 5,10 |
| AGR3         | 2,30E-08 | 5,07 |
| RETN         | 6,29E-20 | 5,05 |
| LRRC36       | 3,53E-23 | 5,04 |
| RAMP3        | 4,16E-22 | 5,04 |
| TPPP3        | 6,77E-16 | 5,02 |
| MFAP4        | 9,35E-10 | 5,00 |
| SLC39A8      | 5,21E-14 | 5,00 |
| NOSTRIN      | 1,80E-16 | 5,00 |
| PLEKHK1      | 1,15E-25 | 4,99 |
| PLA2G1B      | 7,00E-15 | 4,90 |
| HIGD1B       | 1,69E-15 | 4,87 |
| GDF10        | 1,17E-22 | 4,86 |
| C13ORF15     | 1,21E-16 | 4,82 |
| NP_835466,1  | 2,17E-15 | 4,80 |
| CD52         | 2,32E-12 | 4,77 |
| KAL1         | 7,56E-15 | 4,74 |
| SDPR         | 1,10E-19 | 4,73 |
| TCF21        | 2,24E-20 | 4,65 |
| ATOH8        | 6,74E-11 | 4,65 |
| 2B32_HUMAN   | 3,27E-04 | 4,62 |
| ABI3BP       | 4,03E-12 | 4,61 |
| CACNA2D2     | 5,80E-14 | 4,59 |
| LYZ          | 4,26E-07 | 4,54 |
| MS4A7        | 2,77E-13 | 4,52 |
| CA4          | 3,75E-25 | 4,50 |
| CXCL2        | 8,99E-08 | 4,50 |
| SLC6A4       | 1,58E-24 | 4,48 |
| EDG1         | 9,39E-15 | 4,42 |
| SPOCK2       | 1,27E-11 | 4,42 |
| CAV1         | 3,69E-15 | 4,34 |
| FIGF         | 6,08E-17 | 4,31 |
| PLEKHH2      | 1,51E-16 | 4,29 |
| ZNF533       | 2,87E-10 | 4,25 |
| SLCO2A1      | 2,30E-10 | 4,21 |
| VSIG2        | 5,57E-16 | 4,20 |
| LMO3         | 3,41E-05 | 4,17 |
| CPA3         | 3,64E-09 | 4,17 |
| IFT57        | 3,49E-17 | 4,16 |
| SELENBP1     | 4,08E-09 | 4,16 |
| VSIG4        | 4,61E-14 | 4,14 |
| EMP2         | 1,35E-16 | 4,14 |
| GLDN         | 3,51E-18 | 4,09 |
| CFD          | 1,16E-14 | 4,07 |
| NPNT         | 2,12E-13 | 4,06 |
| WIF1         | 1,07E-12 | 3,99 |
| S100A4       | 1,04E-12 | 3,94 |
| A2ABK7_HUMAN | 2,13E-05 | 3,94 |
| CALCRL       | 4,22E-14 | 3,91 |
| CGNL1        | 6,73E-13 | 3,89 |

|             |          |      |
|-------------|----------|------|
| ITLN2       | 5,16E-21 | 3,86 |
| AOC3        | 3,33E-20 | 3,84 |
| C9ORF61     | 1,26E-16 | 3,82 |
| NP_079189,3 | 1,22E-15 | 3,81 |
| SLIT2       | 4,97E-16 | 3,78 |
| CD300LG     | 1,30E-22 | 3,78 |
| FGFR4       | 1,91E-14 | 3,76 |
| ANKRD29     | 6,33E-14 | 3,74 |
| C9ORF19     | 2,98E-17 | 3,74 |
| TMPRSS2     | 1,75E-07 | 3,70 |
| CD36        | 3,57E-12 | 3,70 |
| CLEC14A     | 3,67E-13 | 3,68 |
| LMO7        | 1,22E-19 | 3,67 |
| MYH11       | 7,26E-06 | 3,66 |
| KLF4        | 1,51E-10 | 3,63 |
| GNG11       | 1,51E-11 | 3,61 |
| CADM1       | 1,45E-08 | 3,60 |
| FBLN5       | 1,57E-13 | 3,60 |
| FLRT3       | 4,47E-07 | 3,58 |
| CYBB        | 2,77E-13 | 3,57 |
| ALOX5       | 8,35E-12 | 3,55 |
| C1ORF162    | 2,01E-12 | 3,54 |
| NLRC4       | 2,76E-17 | 3,53 |
| MNDA        | 2,75E-12 | 3,53 |
| ESAM        | 8,35E-10 | 3,53 |
| STX11       | 7,30E-19 | 3,51 |
| GPRC5A      | 3,24E-06 | 3,49 |
| GIMAP7      | 7,78E-11 | 3,48 |
| FCN1        | 8,50E-10 | 3,48 |
| MSR1        | 1,10E-19 | 3,48 |
| LRRN3       | 1,07E-20 | 3,46 |
| A2M         | 4,91E-08 | 3,46 |
| VEPH1       | 5,60E-16 | 3,45 |
| NKX2-1      | 2,90E-05 | 3,45 |
| CYBRD1      | 8,82E-10 | 3,44 |
| CD97        | 1,71E-10 | 3,44 |
| PECAM1      | 1,31E-11 | 3,43 |
| ALOX5AP     | 2,93E-10 | 3,42 |
| MAOB        | 1,96E-09 | 3,42 |
| WWC2        | 6,66E-14 | 3,42 |
| HOP_HUMAN   | 3,70E-06 | 3,42 |
| LDB2        | 1,32E-15 | 3,42 |
| TMEM125     | 2,48E-07 | 3,41 |
| AYTL2       | 4,73E-06 | 3,40 |
| GRK5        | 9,39E-15 | 3,38 |
| GPM6A       | 6,09E-23 | 3,36 |
| PTPRB       | 4,10E-19 | 3,35 |
| NR4A2       | 4,06E-09 | 3,34 |
| CLIC3       | 2,57E-14 | 3,32 |
| IL33        | 6,01E-08 | 3,31 |
| PTGDS       | 6,55E-06 | 3,31 |
| LIMS2       | 5,53E-14 | 3,31 |
| FRY         | 7,67E-18 | 3,29 |
| CSF3        | 9,46E-05 | 3,29 |

|                |          |      |
|----------------|----------|------|
| TGFBR3         | 2,23E-17 | 3,29 |
| ANXA3          | 7,03E-13 | 3,28 |
| ACADL          | 1,26E-18 | 3,26 |
| COLEC12        | 5,01E-09 | 3,26 |
| CD83           | 3,90E-11 | 3,25 |
| AMICA1         | 1,71E-09 | 3,24 |
| FGR            | 5,73E-14 | 3,23 |
| NM_001002919,2 | 2,34E-13 | 3,21 |
| SLC6A14        | 1,28E-05 | 3,20 |
| DMBT1          | 1,35E-03 | 3,20 |
| FOS            | 8,10E-09 | 3,20 |
| MSLN           | 2,03E-04 | 3,19 |
| SFTPBP         | 1,47E-02 | 3,18 |
| NP_689963,2    | 7,05E-12 | 3,18 |
| DRAM_HUMAN     | 2,07E-09 | 3,18 |
| TBX2           | 9,97E-09 | 3,18 |
| GRINL1B        | 8,63E-24 | 3,18 |
| RICH2_HUMAN    | 9,24E-11 | 3,17 |
| MLPH           | 3,78E-06 | 3,16 |
| PID1           | 3,88E-13 | 3,16 |
| PLAC8          | 5,01E-09 | 3,15 |
| HLA-DRA        | 5,59E-07 | 3,14 |
| PLLP           | 4,72E-13 | 3,14 |
| AREG           | 3,18E-05 | 3,14 |
| DPYSL2         | 5,20E-11 | 3,13 |
| PTGD2_HUMAN    | 7,12E-12 | 3,12 |
| DUSP1          | 1,21E-08 | 3,11 |
| ADAMTSL3       | 1,26E-18 | 3,08 |
| CLEC12B        | 1,11E-17 | 3,08 |
| CA2            | 8,21E-10 | 3,08 |
| TYROBP         | 4,10E-09 | 3,07 |
| ALDH2          | 8,50E-13 | 3,05 |
| THBD           | 1,49E-07 | 3,04 |
| AXUD1          | 5,86E-09 | 3,04 |
| ROS1           | 3,56E-08 | 3,04 |
| MMP19          | 1,72E-06 | 3,04 |
| ADRB2          | 1,20E-16 | 3,03 |
| SHROOM4        | 2,86E-21 | 3,03 |
| AGTR1          | 2,10E-15 | 3,02 |
| NEDD4L         | 4,05E-14 | 3,01 |
| GIMAP6         | 4,42E-12 | 3,01 |
| MAOA           | 1,87E-07 | 3,01 |
| Q8NAF8_HUMAN   | 1,92E-08 | 3,01 |
| ALDH3B1        | 1,60E-09 | 3,01 |
| EGR2           | 6,10E-11 | 3,00 |
| CYP27A1        | 1,87E-09 | 3,00 |
| KL             | 9,68E-24 | 2,98 |
| SMAD6          | 4,32E-15 | 2,98 |
| CD55           | 3,06E-09 | 2,97 |
| LTA4H          | 4,62E-14 | 2,96 |
| EDNRB          | 1,26E-17 | 2,96 |
| SLC46A2        | 7,00E-15 | 2,93 |
| PCOLCE2        | 5,85E-14 | 2,93 |
| C6ORF60        | 4,76E-13 | 2,92 |

|           |          |      |
|-----------|----------|------|
| FGD5      | 1,69E-18 | 2,92 |
| CCBE1     | 6,76E-16 | 2,91 |
| C14ORF132 | 2,12E-10 | 2,91 |
| APOC1     | 8,44E-06 | 2,91 |
| TIMP3     | 1,29E-07 | 2,91 |
| CHI3L2    | 1,02E-08 | 2,90 |
| SERPINA1  | 3,42E-04 | 2,89 |
| CD93      | 1,39E-09 | 2,89 |
| CCDC48    | 1,65E-21 | 2,88 |
| SCTR      | 4,15E-06 | 2,88 |
| SPARCL1   | 2,58E-09 | 2,88 |
| GPD1      | 1,17E-22 | 2,87 |
| ASAH1     | 5,44E-11 | 2,85 |
| COL4A3    | 3,00E-10 | 2,85 |
| DPEP2     | 1,77E-14 | 2,85 |
| PHACTR2   | 5,14E-13 | 2,85 |
| UBL3      | 3,62E-15 | 2,84 |
| NCF2      | 1,26E-10 | 2,84 |
| PROS1     | 4,35E-08 | 2,84 |
| GIMAP8    | 3,40E-15 | 2,84 |
| CYB5A     | 1,94E-08 | 2,84 |
| C20ORF46  | 3,39E-18 | 2,84 |
| RNASE1    | 1,81E-05 | 2,83 |
| HBEGF     | 5,32E-08 | 2,82 |
| KLF6      | 1,71E-11 | 2,82 |
| SLC1A1    | 6,04E-13 | 2,80 |
| MGP       | 4,99E-06 | 2,79 |
| SEPP1     | 3,82E-06 | 2,78 |
| EFEMP1    | 1,01E-06 | 2,78 |
| PAPSS2    | 3,13E-10 | 2,78 |
| EMCN      | 7,32E-17 | 2,77 |
| ENPP4     | 3,93E-09 | 2,77 |
| RNASE4    | 1,47E-09 | 2,77 |
| C10ORF128 | 8,69E-10 | 2,76 |
| PTGS2     | 2,79E-05 | 2,76 |
| METTTL7A  | 4,82E-08 | 2,74 |
| ANKRD47   | 1,84E-19 | 2,74 |
| CTSS      | 1,36E-08 | 2,74 |
| SELP      | 8,68E-08 | 2,73 |
| CYYR1     | 5,57E-14 | 2,73 |
| GMFG      | 2,82E-10 | 2,73 |
| ADCY4     | 3,10E-11 | 2,73 |
| PLSCR4    | 1,45E-10 | 2,73 |
| DNALI1    | 1,51E-09 | 2,73 |
| DAPK1     | 8,63E-10 | 2,73 |
| HSPA12B   | 8,25E-13 | 2,73 |
| FCER1A    | 2,21E-09 | 2,72 |
| ALPL      | 1,39E-04 | 2,72 |
| EGFL7     | 9,81E-12 | 2,72 |
| TREM1     | 1,38E-05 | 2,72 |
| C5AR1     | 1,67E-09 | 2,71 |
| ANKRD25   | 1,43E-11 | 2,71 |
| NEBL      | 1,56E-10 | 2,71 |
| SPTBN1    | 2,23E-19 | 2,70 |



|                |          |      |
|----------------|----------|------|
| LDLR           | 1,26E-08 | 2,69 |
| C7ORF41        | 1,95E-09 | 2,68 |
| ACP5           | 1,87E-06 | 2,67 |
| SULT1A2        | 3,96E-10 | 2,66 |
| TMEM47         | 2,02E-09 | 2,66 |
| MUC1           | 7,88E-04 | 2,66 |
| GYPC           | 1,05E-09 | 2,66 |
| IGSF10         | 1,22E-17 | 2,66 |
| CAT            | 7,37E-14 | 2,65 |
| FOXF1          | 2,82E-15 | 2,65 |
| TACC1          | 3,91E-10 | 2,65 |
| LTBP2          | 3,73E-08 | 2,65 |
| MS4A2          | 1,14E-12 | 2,65 |
| DENND3         | 6,19E-11 | 2,64 |
| HSD17B11       | 6,98E-09 | 2,64 |
| DACH1          | 2,57E-14 | 2,64 |
| IL7R           | 2,27E-07 | 2,63 |
| KIAA1683       | 4,67E-14 | 2,63 |
| STXBP6         | 6,07E-08 | 2,63 |
| TBX3           | 9,26E-14 | 2,63 |
| H33_HUMAN      | 3,67E-13 | 2,62 |
| Q7Z7L8_HUMAN   | 1,41E-04 | 2,62 |
| NEDD9          | 1,53E-09 | 2,61 |
| SOCS2          | 4,55E-07 | 2,60 |
| CRIP2          | 6,03E-05 | 2,59 |
| CDH5           | 4,86E-16 | 2,59 |
| TRYB2_HUMAN    | 2,40E-04 | 2,59 |
| ITM2A          | 5,40E-06 | 2,59 |
| NR3C2          | 9,28E-14 | 2,59 |
| ZFP36          | 2,68E-07 | 2,58 |
| CAMK2N1        | 3,36E-05 | 2,58 |
| CITED2         | 9,23E-10 | 2,58 |
| BTK            | 1,38E-09 | 2,57 |
| ARHGEF6        | 4,54E-09 | 2,57 |
| NP_001009555,2 | 1,42E-11 | 2,57 |
| GRASP          | 4,61E-11 | 2,57 |
| NP_116284,2    | 1,96E-10 | 2,56 |
| MMP28          | 6,35E-10 | 2,56 |
| FLVCR2         | 1,45E-11 | 2,56 |
| ZEB2           | 4,20E-11 | 2,56 |
| NP_001093858,1 | 2,62E-06 | 2,56 |
| GIMAP5         | 8,11E-10 | 2,55 |
| C8ORF4         | 2,19E-05 | 2,54 |
| CDO1           | 1,62E-16 | 2,54 |
| NP_060761,2    | 1,59E-09 | 2,53 |
| LYVE1          | 8,38E-16 | 2,53 |
| EDN1           | 1,44E-08 | 2,52 |
| KLF9           | 2,22E-09 | 2,52 |
| SEMA3G         | 2,40E-14 | 2,52 |
| KLF2           | 6,13E-10 | 2,52 |
| TRPC6          | 5,27E-12 | 2,52 |
| CCRL2          | 1,62E-09 | 2,52 |
| CD300C         | 1,34E-10 | 2,51 |
| COBL           | 6,54E-07 | 2,51 |

|                |          |      |
|----------------|----------|------|
| C2ORF40        | 9,99E-10 | 2,51 |
| COX7A1         | 1,38E-10 | 2,51 |
| ARHGAP18       | 6,31E-11 | 2,51 |
| NP_001073160,1 | 1,33E-12 | 2,51 |
| PRX            | 1,84E-19 | 2,51 |
| NP_443121,1    | 3,11E-10 | 2,51 |
| PPP1R15A       | 5,27E-11 | 2,51 |
| HECW2          | 2,73E-12 | 2,51 |
| SNX25          | 2,65E-14 | 2,50 |
| CTSH           | 1,98E-06 | 2,50 |
| TRPV2          | 1,93E-15 | 2,50 |
| GBP4           | 1,25E-07 | 2,50 |
| CEACAM6        | 8,83E-03 | 2,48 |
| SVEP1          | 4,03E-09 | 2,48 |
| GATA2          | 6,77E-16 | 2,48 |
| LAML1_HUMAN    | 4,89E-08 | 2,47 |
| LIMCH1         | 4,20E-08 | 2,47 |
| NP_079006,1    | 2,76E-08 | 2,47 |
| FCER1G         | 6,22E-08 | 2,47 |
| GCHFR          | 7,92E-12 | 2,46 |
| RBP4           | 2,60E-10 | 2,46 |
| SH3BGRL        | 3,45E-08 | 2,46 |
| SH2D3C         | 4,74E-12 | 2,45 |
| C1QA           | 8,60E-07 | 2,45 |
| KCTD12         | 1,10E-11 | 2,45 |
| EDG6           | 3,21E-10 | 2,45 |
| C9ORF24        | 2,39E-05 | 2,44 |
| ITGAM          | 9,48E-09 | 2,43 |
| ZBTB16         | 8,94E-09 | 2,43 |
| DNASE1L3       | 3,82E-13 | 2,43 |
| GATA6          | 5,98E-09 | 2,42 |
| PPP1R3C        | 3,45E-08 | 2,41 |
| RGS2           | 1,48E-06 | 2,41 |
| SLC35A1        | 2,73E-12 | 2,41 |
| EGR1           | 8,86E-08 | 2,41 |
| RASIP1         | 1,30E-06 | 2,41 |
| K0256_HUMAN    | 5,37E-13 | 2,40 |
| CLEC1A         | 3,12E-13 | 2,40 |
| STOM           | 3,79E-11 | 2,40 |
| ITGA8          | 5,93E-13 | 2,40 |
| LTBP4          | 2,47E-07 | 2,40 |
| SGCG           | 7,30E-19 | 2,40 |
| APOH           | 5,61E-08 | 2,39 |
| SG269_HUMAN    | 2,61E-10 | 2,39 |
| SLPI           | 4,03E-05 | 2,39 |
| BMP5           | 2,44E-06 | 2,39 |
| LMO2           | 1,48E-14 | 2,38 |
| MMRN2          | 2,92E-09 | 2,38 |
| LRRC32         | 9,12E-10 | 2,37 |
| FAM105A        | 5,28E-08 | 2,37 |
| NTNG1          | 1,15E-18 | 2,36 |
| ROR1           | 6,84E-09 | 2,35 |
| FLI1           | 6,58E-10 | 2,35 |
| TRIM22         | 6,31E-07 | 2,35 |

|                |          |      |
|----------------|----------|------|
| Q8N843_HUMAN   | 6,25E-05 | 2,35 |
| ENG            | 8,91E-07 | 2,35 |
| IGSF6          | 2,71E-07 | 2,35 |
| HOXA5          | 3,25E-08 | 2,34 |
| ICAM4          | 2,97E-08 | 2,34 |
| LGALS3         | 1,76E-08 | 2,34 |
| ARRDC4         | 1,78E-09 | 2,34 |
| HK3            | 3,27E-12 | 2,33 |
| TSPAN8         | 1,63E-03 | 2,33 |
| NP_001073159,1 | 6,83E-08 | 2,33 |
| C11ORF9        | 1,26E-10 | 2,33 |
| LIPA           | 3,56E-06 | 2,33 |
| FAM38B         | 1,05E-05 | 2,33 |
| EDNRA          | 1,13E-08 | 2,32 |
| KCNK3          | 7,79E-11 | 2,32 |
| SLCO2B1        | 8,00E-07 | 2,32 |
| JAM2           | 4,97E-12 | 2,32 |
| LHFP           | 6,70E-09 | 2,32 |
| PDLIM2         | 1,49E-09 | 2,32 |
| PRAM1          | 7,44E-17 | 2,31 |
| LPHN2          | 5,74E-10 | 2,31 |
| GLS            | 1,09E-05 | 2,30 |
| ID2            | 7,54E-08 | 2,30 |
| MYADM          | 1,83E-07 | 2,29 |
| FCGR3A         | 1,50E-06 | 2,29 |
| SLC7A7         | 4,59E-09 | 2,29 |
| AQP9           | 2,84E-06 | 2,29 |
| LY86           | 3,85E-08 | 2,29 |
| GPD1L          | 5,77E-11 | 2,29 |
| NRGN           | 9,25E-06 | 2,29 |
| ACSL5          | 8,48E-05 | 2,28 |
| RRAD           | 3,21E-06 | 2,28 |
| C7ORF23        | 3,64E-09 | 2,28 |
| SPI1           | 4,05E-10 | 2,28 |
| MYO5C          | 9,62E-07 | 2,28 |
| GADD45B        | 7,86E-06 | 2,28 |
| IL18R1         | 9,07E-09 | 2,28 |
| FOLR3          | 6,79E-10 | 2,28 |
| CCL2           | 3,35E-04 | 2,27 |
| EVI2B          | 1,72E-05 | 2,27 |
| PAG1           | 8,56E-09 | 2,27 |
| RASL12         | 4,52E-12 | 2,27 |
| SNX10          | 5,99E-08 | 2,27 |
| ALDH1A2        | 4,13E-06 | 2,27 |
| NP_689930,1    | 2,32E-13 | 2,26 |
| CST6           | 1,69E-04 | 2,26 |
| DNHD2          | 1,38E-08 | 2,26 |
| MGLL           | 1,09E-05 | 2,26 |
| IL8RB          | 1,99E-09 | 2,26 |
| ASPA           | 1,01E-16 | 2,26 |
| SLC9A3R2       | 2,10E-06 | 2,26 |
| TNFSF13        | 8,17E-11 | 2,25 |
| TM6SF1         | 1,66E-13 | 2,25 |
| GABARAPL3      | 1,21E-12 | 2,25 |

|             |          |      |
|-------------|----------|------|
| GIMAP4      | 3,30E-07 | 2,25 |
| SERINC1     | 4,85E-10 | 2,25 |
| RERG        | 2,14E-10 | 2,25 |
| CXCL16      | 1,34E-06 | 2,25 |
| CYP3A5      | 3,72E-09 | 2,25 |
| RASSF2      | 5,83E-07 | 2,24 |
| CD69        | 1,46E-07 | 2,24 |
| SCEL        | 1,50E-07 | 2,24 |
| DYNLRB2     | 6,75E-07 | 2,24 |
| HHIP        | 5,47E-13 | 2,24 |
| SLC15A3     | 4,56E-08 | 2,23 |
| ICAM5       | 1,03E-07 | 2,23 |
| SLC11A1     | 3,62E-13 | 2,23 |
| C1QTNF7     | 3,02E-19 | 2,23 |
| FZD4        | 1,06E-12 | 2,23 |
| FAM134B     | 5,56E-09 | 2,22 |
| EFCBP1      | 5,80E-14 | 2,22 |
| SNRK        | 3,53E-15 | 2,22 |
| FRMD3       | 1,06E-15 | 2,22 |
| APOL3       | 4,17E-08 | 2,21 |
| PER1        | 1,44E-06 | 2,21 |
| C1ORF115    | 2,78E-12 | 2,21 |
| SH3BGRL2    | 7,24E-08 | 2,21 |
| CPVL        | 7,70E-06 | 2,20 |
| CNTN6       | 8,66E-21 | 2,20 |
| LPXN        | 5,73E-07 | 2,20 |
| RCAN2       | 1,77E-06 | 2,19 |
| TFPI        | 6,45E-04 | 2,19 |
| UNC13B      | 9,21E-09 | 2,19 |
| CGN         | 3,00E-04 | 2,19 |
| AP1S2       | 1,95E-07 | 2,19 |
| CMAH        | 3,55E-05 | 2,19 |
| RTN1        | 7,83E-11 | 2,19 |
| FAT4        | 4,06E-09 | 2,19 |
| PTPRM       | 1,18E-08 | 2,18 |
| MACROD2     | 5,35E-06 | 2,18 |
| C5          | 3,79E-04 | 2,18 |
| KIT         | 8,17E-05 | 2,18 |
| KIAA1324L   | 4,73E-08 | 2,18 |
| C9ORF5      | 1,09E-09 | 2,18 |
| CD300LF     | 9,46E-12 | 2,18 |
| TDRD10      | 3,38E-09 | 2,18 |
| TM7SF4      | 9,95E-10 | 2,18 |
| HRASLS3     | 1,83E-04 | 2,17 |
| AKAP13      | 1,03E-10 | 2,17 |
| NP_059135,2 | 1,52E-13 | 2,17 |
| AK1         | 8,82E-11 | 2,17 |
| DAAM2       | 3,21E-06 | 2,16 |
| GPC3        | 3,91E-06 | 2,16 |
| TSC22D3     | 1,15E-05 | 2,16 |
| MICALCL     | 3,90E-10 | 2,16 |
| RECK        | 6,40E-11 | 2,15 |
| SLC31A2     | 4,04E-15 | 2,15 |
| PTPLA       | 8,80E-06 | 2,15 |

|             |          |      |
|-------------|----------|------|
| TXNIP       | 5,62E-06 | 2,15 |
| RAI2        | 2,18E-12 | 2,15 |
| SOD3        | 1,84E-03 | 2,14 |
| SOX18       | 2,37E-04 | 2,14 |
| RSPO2       | 3,80E-21 | 2,14 |
| SHE         | 8,68E-13 | 2,14 |
| HSPB6       | 2,02E-06 | 2,14 |
| C5ORF23     | 2,86E-07 | 2,14 |
| RARA        | 3,58E-06 | 2,14 |
| TREM2       | 4,32E-05 | 2,14 |
| STEAP4      | 4,89E-08 | 2,13 |
| HLA-DQB1    | 4,01E-04 | 2,13 |
| CTSO        | 9,39E-09 | 2,13 |
| DPT         | 3,00E-04 | 2,13 |
| SAHH3_HUMAN | 9,16E-08 | 2,13 |
| CCDC85A     | 2,22E-19 | 2,13 |
| SASH1       | 7,59E-15 | 2,13 |
| SPN         | 7,77E-11 | 2,13 |
| DOCK8       | 2,37E-07 | 2,13 |
| NP_620419,2 | 2,24E-06 | 2,13 |
| ZMYND15     | 1,11E-10 | 2,13 |
| C13ORF30    | 1,50E-07 | 2,12 |
| SERPING1    | 3,67E-05 | 2,12 |
| ANKRD1      | 4,89E-15 | 2,12 |
| CTNNAL1     | 4,24E-08 | 2,12 |
| WFDC1       | 1,33E-14 | 2,12 |
| ARPC3       | 5,61E-07 | 2,12 |
| MOSC2       | 2,20E-10 | 2,12 |
| FAM82C      | 3,39E-18 | 2,12 |
| SLC40A1     | 1,85E-04 | 2,11 |
| NEXN        | 2,38E-08 | 2,11 |
| ADHFE1      | 2,12E-09 | 2,11 |
| SULT1A1     | 1,44E-09 | 2,11 |
| CFL2        | 2,10E-11 | 2,11 |
| SPATA18     | 2,88E-08 | 2,11 |
| SH2B3       | 9,55E-10 | 2,11 |
| PRELP       | 8,12E-05 | 2,11 |
| STAC        | 2,08E-14 | 2,11 |
| GRRP1       | 9,95E-08 | 2,10 |
| LOH11CR2A   | 5,97E-08 | 2,10 |
| RAMP2       | 1,28E-14 | 2,10 |
| CBX7        | 2,03E-12 | 2,10 |
| AQP1        | 8,66E-06 | 2,10 |
| PCDH17      | 7,70E-07 | 2,10 |
| OSCAR       | 5,23E-12 | 2,10 |
| REEP5       | 1,35E-08 | 2,09 |
| ITPR1       | 1,94E-07 | 2,09 |
| CAV2        | 3,67E-05 | 2,09 |
| ERP27       | 2,19E-04 | 2,09 |
| TMBIM1      | 1,92E-09 | 2,09 |
| EPB41L3     | 7,69E-07 | 2,09 |
| HSPB8       | 3,16E-09 | 2,09 |
| DUOXA1      | 9,67E-09 | 2,09 |
| CD53        | 8,43E-06 | 2,09 |

|                |          |      |
|----------------|----------|------|
| AIF1           | 1,71E-05 | 2,09 |
| ALDH1A1        | 9,79E-03 | 2,08 |
| C1QB           | 3,89E-05 | 2,08 |
| SOSTDC1        | 9,64E-04 | 2,08 |
| NFKBIZ         | 4,85E-06 | 2,08 |
| NP_694996,3    | 7,03E-12 | 2,08 |
| MAP3K8         | 1,80E-06 | 2,07 |
| SH3GL3         | 1,82E-07 | 2,07 |
| COX4I2         | 1,41E-09 | 2,07 |
| SAMD9L         | 2,34E-09 | 2,07 |
| APOLD1         | 4,24E-06 | 2,07 |
| NP_056410,2    | 7,88E-13 | 2,07 |
| ICAM2          | 1,57E-06 | 2,06 |
| NP_659495,1    | 5,21E-13 | 2,06 |
| KLRB1          | 2,52E-04 | 2,06 |
| BCL2A1         | 2,35E-07 | 2,06 |
| CASQ2          | 7,13E-15 | 2,06 |
| IFIT2          | 2,30E-06 | 2,06 |
| CD34           | 1,72E-05 | 2,06 |
| C1QC           | 1,49E-05 | 2,06 |
| N4BP1_HUMAN    | 7,20E-11 | 2,06 |
| ZFP106         | 1,66E-13 | 2,05 |
| PRKCZ          | 2,92E-10 | 2,05 |
| SEMA3B         | 1,07E-10 | 2,05 |
| Q68DG2_HUMAN   | 2,22E-19 | 2,05 |
| HCST           | 2,05E-06 | 2,05 |
| ZNF331         | 6,98E-05 | 2,05 |
| HNMT           | 4,97E-06 | 2,05 |
| ID4            | 1,62E-13 | 2,05 |
| NP_001025167,1 | 2,36E-08 | 2,05 |
| FMO5           | 2,05E-05 | 2,05 |
| FCHO2          | 5,81E-08 | 2,05 |
| PRICKLE2       | 1,23E-07 | 2,04 |
| MMRN1          | 6,65E-12 | 2,04 |
| FCGR3B         | 2,41E-09 | 2,04 |
| AIF1_HUMAN     | 2,64E-06 | 2,04 |
| MT1M           | 2,53E-04 | 2,04 |
| ANK3           | 3,56E-07 | 2,04 |
| CENTD3         | 6,78E-11 | 2,03 |
| SRPX           | 1,03E-04 | 2,03 |
| BMP2           | 1,67E-09 | 2,03 |
| MAML1          | 1,07E-07 | 2,03 |
| HLF            | 2,83E-11 | 2,03 |
| DDAH1          | 2,72E-05 | 2,03 |
| SIGLEC11       | 1,57E-11 | 2,02 |
| IFIT1          | 1,96E-04 | 2,02 |
| HEG1           | 2,59E-07 | 2,02 |
| SLC27A3        | 1,46E-06 | 2,02 |
| PLA2G10        | 5,44E-04 | 2,02 |
| GPM6B          | 4,48E-10 | 2,02 |
| NPR1           | 6,03E-10 | 2,02 |
| TMC5           | 1,92E-03 | 2,02 |
| RRAS           | 4,45E-07 | 2,02 |
| ST3GAL5        | 1,09E-04 | 2,02 |

|         |          |      |
|---------|----------|------|
| CAMP    | 1,38E-12 | 2,02 |
| ALOX15B | 4,40E-04 | 2,01 |
| SESN1   | 1,54E-08 | 2,01 |
| DPYD    | 5,16E-06 | 2,01 |
| DARC    | 5,29E-04 | 2,01 |
| DEFA1   | 7,61E-07 | 2,01 |
| PLEKHC1 | 3,31E-06 | 2,00 |
| CAPSL   | 1,43E-06 | 2,00 |
| GRAMD2  | 4,04E-11 | 2,00 |

### Genes up-regulated in NSCLC

| Gene ID  | adj. p-value | Fold change |
|----------|--------------|-------------|
| SPP1     | 2,76E-17     | 14,52       |
| MMP1     | 5,20E-11     | 10,74       |
| KRT6A    | 3,85E-05     | 10,39       |
| KRT17    | 1,86E-06     | 9,44        |
| CTHRC1   | 2,76E-17     | 7,62        |
| S100A2   | 2,21E-05     | 7,44        |
| MMP11    | 1,29E-11     | 7,14        |
| TMPRSS4  | 1,04E-08     | 6,85        |
| CDC20    | 1,59E-13     | 6,82        |
| KRT6B    | 7,41E-04     | 6,15        |
| P11388-2 | 9,29E-14     | 6,07        |
| COL7A1   | 4,99E-09     | 6,07        |
| GJB2     | 2,42E-08     | 5,98        |
| KRT5     | 5,73E-04     | 5,86        |
| MMP12    | 1,47E-08     | 5,64        |
| SERPINB5 | 6,48E-05     | 5,48        |
| AKR1B10  | 1,35E-03     | 5,47        |
| PYCR1    | 1,83E-17     | 5,43        |
| CALML3   | 7,23E-04     | 5,29        |
| KRT6C    | 1,12E-03     | 5,13        |
| CCNB2    | 1,46E-14     | 5,00        |
| KRT15    | 1,51E-04     | 4,96        |
| SLC2A1   | 2,13E-08     | 4,89        |
| SULF1    | 3,22E-13     | 4,79        |
| C20ORF42 | 6,65E-09     | 4,68        |
| IGFBP3   | 8,95E-11     | 4,57        |
| MCM2     | 2,12E-11     | 4,46        |
| TK1      | 6,94E-11     | 4,40        |
| MMP9     | 3,94E-09     | 4,37        |
| BIRC5    | 2,48E-12     | 4,31        |
| COL1A1   | 2,94E-07     | 4,29        |
| AURKB    | 4,25E-12     | 4,25        |
| KIF2C    | 2,97E-13     | 4,20        |
| ECE2     | 3,13E-11     | 4,15        |
| UCHL1    | 4,06E-06     | 4,14        |
| CDKN3    | 2,15E-12     | 4,08        |
| KRT16    | 1,20E-03     | 4,08        |
| TP63     | 2,17E-04     | 4,07        |
| COL1A2   | 3,32E-12     | 4,04        |
| CCNB1    | 3,37E-13     | 4,01        |
| FOXM1    | 6,28E-11     | 4,01        |

|             |          |      |
|-------------|----------|------|
| KRT14       | 1,61E-03 | 3,99 |
| MDK         | 1,51E-09 | 3,98 |
| HMGB3       | 2,31E-10 | 3,97 |
| THBS2       | 2,45E-10 | 3,95 |
| GPR87       | 3,73E-06 | 3,92 |
| IQGAP3      | 3,30E-11 | 3,84 |
| ASPM        | 7,46E-12 | 3,82 |
| NR_003287,1 | 1,29E-11 | 3,81 |
| KIAA0101    | 2,24E-11 | 3,81 |
| PSAT1       | 6,23E-12 | 3,80 |
| LTF         | 1,42E-03 | 3,79 |
| PNCK        | 3,87E-05 | 3,75 |
| AK3L2       | 2,64E-11 | 3,73 |
| LOXL2       | 7,12E-10 | 3,72 |
| CDH3        | 5,45E-08 | 3,70 |
| MYBL2       | 4,38E-11 | 3,65 |
| PI3         | 1,26E-03 | 3,63 |
| IGLV3-9     | 6,61E-04 | 3,63 |
| PRC1        | 2,32E-12 | 3,60 |
| COL10A1     | 1,09E-09 | 3,59 |
| CEP55       | 1,43E-11 | 3,59 |
| SPAG5       | 2,70E-13 | 3,58 |
| TYMS        | 7,43E-12 | 3,57 |
| GAPDH       | 6,77E-17 | 3,56 |
| MMP3        | 7,42E-06 | 3,54 |
| IGKV3D-7    | 1,29E-03 | 3,52 |
| MMP10       | 6,55E-04 | 3,51 |
| NM_016459,3 | 5,54E-05 | 3,50 |
| PTTG2       | 4,38E-11 | 3,47 |
| AKR1C2      | 8,10E-03 | 3,47 |
| CXCL14      | 2,43E-04 | 3,46 |
| IMA2_HUMAN  | 6,71E-13 | 3,46 |
| TUBB3       | 3,12E-08 | 3,46 |
| WDR72       | 1,16E-04 | 3,44 |
| CP          | 1,66E-04 | 3,43 |
| NM_006607,2 | 1,65E-12 | 3,43 |
| IGHG3       | 2,05E-03 | 3,40 |
| S100A7      | 1,61E-03 | 3,39 |
| POSTN       | 3,46E-06 | 3,38 |
| IGFBP2      | 6,77E-06 | 3,38 |
| TUBB2B      | 1,07E-03 | 3,37 |
| PPAP2C      | 5,39E-09 | 3,37 |
| IGSF9       | 1,64E-08 | 3,36 |
| DLG7        | 3,35E-12 | 3,36 |
| CDC45L      | 1,39E-09 | 3,35 |
| IGF2BP3     | 4,00E-06 | 3,34 |
| CLCA2       | 1,30E-03 | 3,34 |
| CABYR       | 2,57E-07 | 3,31 |
| UBE2S       | 8,47E-11 | 3,31 |
| POLQ        | 4,00E-11 | 3,30 |
| IGKV3-20    | 8,79E-04 | 3,29 |
| SPAG4       | 6,14E-12 | 3,29 |
| LEG7_HUMAN  | 3,20E-03 | 3,29 |
| CTSL2       | 3,02E-06 | 3,28 |



|            |          |      |
|------------|----------|------|
| NME2       | 9,04E-16 | 3,27 |
| TTK        | 8,69E-10 | 3,27 |
| MLLT11     | 3,73E-06 | 3,25 |
| RFC4       | 9,65E-11 | 3,24 |
| NCAPG      | 5,90E-11 | 3,24 |
| PROM2      | 2,20E-06 | 3,20 |
| IGKV2-40   | 7,11E-04 | 3,19 |
| SFN        | 8,15E-05 | 3,19 |
| FAP        | 1,55E-08 | 3,19 |
| COL5A2     | 4,88E-08 | 3,17 |
| IGKV1-39   | 1,39E-03 | 3,16 |
| TMEM132A   | 1,95E-12 | 3,15 |
| EIF4EBP1   | 6,23E-07 | 3,14 |
| ALDH3B2    | 2,97E-06 | 3,13 |
| AURKA      | 6,28E-11 | 3,11 |
| MAGED4     | 6,33E-10 | 3,09 |
| MCM4       | 9,76E-11 | 3,08 |
| IGKV2D-29  | 1,17E-03 | 3,07 |
| MFAP2      | 4,38E-09 | 3,06 |
| PBK        | 4,11E-09 | 3,06 |
| GYLTL1B    | 5,53E-09 | 3,05 |
| CNTNAP2    | 1,18E-04 | 3,05 |
| MIF        | 3,13E-12 | 3,05 |
| UBE2T      | 5,13E-11 | 3,04 |
| SERPINB13  | 2,10E-03 | 3,03 |
| SPRR1B     | 2,06E-03 | 3,03 |
| GPT2       | 4,18E-09 | 2,99 |
| CDCA8      | 6,33E-10 | 2,99 |
| HIG2_HUMAN | 3,19E-07 | 2,97 |
| DSG3       | 2,31E-03 | 2,96 |
| CENPF      | 2,17E-09 | 2,95 |
| KRT80      | 3,50E-06 | 2,93 |
| TRIP13     | 2,60E-08 | 2,93 |
| IGKV1-6    | 1,61E-03 | 2,91 |
| PAFAH1B3   | 1,81E-08 | 2,90 |
| C16ORF75   | 1,94E-10 | 2,90 |
| GREM1      | 3,01E-08 | 2,89 |
| PLAU       | 4,37E-08 | 2,89 |
| COL3A1     | 3,12E-13 | 2,88 |
| ANLN       | 7,97E-10 | 2,88 |
| PERP       | 3,67E-05 | 2,87 |
| KIF23      | 3,21E-10 | 2,87 |
| DDIT4      | 5,47E-08 | 2,86 |
| ECT2       | 3,86E-08 | 2,85 |
| HIST2H2AA4 | 4,13E-08 | 2,84 |
| SAA2       | 6,84E-04 | 2,83 |
| IL4I1      | 5,90E-11 | 2,82 |
| SHMT2      | 2,22E-17 | 2,81 |
| CA12       | 4,26E-05 | 2,80 |
| C18ORF24   | 1,85E-10 | 2,80 |
| SERPINE2   | 1,87E-07 | 2,79 |
| CENPN      | 3,38E-09 | 2,78 |
| FAM83D     | 8,57E-08 | 2,78 |
| TPI1       | 3,17E-08 | 2,78 |

|                |          |      |
|----------------|----------|------|
| MXRA5          | 9,02E-07 | 2,77 |
| TIMP1          | 1,74E-08 | 2,75 |
| UHRF1          | 1,83E-10 | 2,74 |
| PHGDH          | 3,56E-06 | 2,73 |
| COL5A1         | 2,36E-05 | 2,73 |
| KIF20A         | 3,29E-11 | 2,72 |
| GCLC           | 7,23E-05 | 2,72 |
| RAD51AP1       | 9,02E-08 | 2,71 |
| MAD2L1         | 1,56E-09 | 2,71 |
| UCK2           | 1,29E-11 | 2,70 |
| KCRU_HUMAN     | 3,44E-06 | 2,69 |
| SERPINB3       | 3,54E-03 | 2,69 |
| BIK            | 1,34E-09 | 2,68 |
| HIST1H2BD      | 3,30E-10 | 2,65 |
| HIST2H2AC      | 1,11E-07 | 2,65 |
| SCG5           | 9,80E-08 | 2,65 |
| NMU            | 1,65E-05 | 2,65 |
| ITGB4          | 5,87E-05 | 2,64 |
| GGH            | 1,70E-06 | 2,64 |
| MELK           | 3,13E-09 | 2,64 |
| WDR86          | 6,85E-08 | 2,64 |
| CA9            | 3,20E-05 | 2,64 |
| C1ORF106       | 6,65E-07 | 2,64 |
| TROAP          | 5,02E-09 | 2,59 |
| FKBP4          | 1,52E-07 | 2,59 |
| NPM3           | 2,33E-12 | 2,58 |
| DSC3           | 3,07E-04 | 2,58 |
| DAPL1          | 2,02E-02 | 2,56 |
| PAICS          | 1,14E-11 | 2,56 |
| KIF4A          | 3,67E-11 | 2,55 |
| BUB1B          | 2,08E-11 | 2,55 |
| BAIAP2L1       | 1,29E-07 | 2,55 |
| GPI            | 1,06E-06 | 2,54 |
| CKS1B          | 5,64E-09 | 2,53 |
| SLC2A5         | 3,57E-12 | 2,53 |
| IL20RB         | 2,02E-04 | 2,53 |
| ALDH18A1       | 2,19E-21 | 2,52 |
| CRABP2         | 2,54E-05 | 2,51 |
| HN1            | 1,86E-08 | 2,51 |
| FAKTS_HUMAN    | 1,42E-10 | 2,50 |
| TPBG           | 2,41E-09 | 2,50 |
| TIMELESS       | 2,97E-10 | 2,50 |
| PRAME          | 5,55E-06 | 2,49 |
| SPRR3          | 2,07E-02 | 2,49 |
| TBB5_HUMAN     | 9,46E-12 | 2,48 |
| LMNB2          | 1,53E-08 | 2,47 |
| NR_002187,2    | 2,09E-10 | 2,46 |
| BUB1           | 1,64E-10 | 2,45 |
| WDHD1          | 6,46E-11 | 2,45 |
| H2AFV          | 3,55E-03 | 2,44 |
| S100A16        | 3,13E-05 | 2,43 |
| Q4G0D9_HUMAN   | 1,07E-08 | 2,43 |
| TNFRSF18       | 3,65E-08 | 2,43 |
| NP_001015050,1 | 2,56E-06 | 2,43 |

|            |          |      |
|------------|----------|------|
| ZIC2       | 1,38E-04 | 2,43 |
| AIM2       | 2,81E-05 | 2,42 |
| NCAPD2     | 4,09E-07 | 2,42 |
| SORD       | 1,05E-09 | 2,41 |
| RPL39L     | 4,90E-08 | 2,41 |
| KNTC1      | 1,16E-12 | 2,40 |
| CDH2       | 3,73E-04 | 2,39 |
| NDC80      | 1,44E-09 | 2,39 |
| PRDX4      | 3,39E-17 | 2,39 |
| WDR66      | 2,61E-04 | 2,39 |
| KIF14      | 3,87E-10 | 2,38 |
| CEACAM5    | 4,76E-02 | 2,38 |
| ARNTL2     | 6,36E-07 | 2,37 |
| CCT5       | 5,01E-09 | 2,37 |
| ERO1L      | 2,32E-07 | 2,37 |
| PTGFRN     | 6,26E-09 | 2,37 |
| HMGA1      | 5,95E-08 | 2,37 |
| CD79A      | 4,12E-04 | 2,36 |
| HOXC6      | 1,85E-06 | 2,35 |
| KDEL3      | 1,81E-09 | 2,35 |
| PFKP       | 4,42E-07 | 2,35 |
| COCH       | 6,06E-06 | 2,34 |
| CCNA2      | 7,20E-10 | 2,34 |
| MAGEA3     | 3,64E-04 | 2,34 |
| HN1L_HUMAN | 3,00E-10 | 2,34 |
| DTL        | 4,89E-08 | 2,34 |
| SRPX2      | 1,44E-07 | 2,33 |
| TRIM16L    | 4,60E-04 | 2,33 |
| NCAPH      | 5,93E-09 | 2,33 |
| ATF5       | 5,46E-09 | 2,32 |
| POU2AF1    | 3,01E-06 | 2,32 |
| PDIA4      | 4,51E-13 | 2,32 |
| CXCL13     | 1,78E-05 | 2,32 |
| RBM35A     | 1,60E-05 | 2,32 |
| ANKRD22    | 1,54E-06 | 2,32 |
| KDEL2      | 2,82E-14 | 2,32 |
| PAK1       | 9,63E-09 | 2,32 |
| KIF11      | 9,97E-10 | 2,31 |
| CENPA      | 2,53E-08 | 2,31 |
| OIP5       | 1,80E-07 | 2,31 |
| ALDOC      | 3,74E-06 | 2,30 |
| GMNN       | 4,98E-09 | 2,30 |
| PMAIP1     | 9,61E-07 | 2,30 |
| CENPM      | 7,40E-08 | 2,30 |
| FAM64A     | 1,47E-07 | 2,30 |
| HOXB7      | 2,18E-06 | 2,30 |
| RNASEH2A   | 3,60E-08 | 2,30 |
| ANGPTL4    | 4,99E-04 | 2,29 |
| H2AFX      | 6,49E-07 | 2,29 |
| STRA6      | 1,11E-06 | 2,29 |
| NO55_HUMAN | 1,18E-11 | 2,29 |
| EGLN3      | 2,45E-06 | 2,29 |
| SRD5A1     | 5,54E-10 | 2,28 |
| LEPREL2    | 1,19E-06 | 2,28 |

|                |          |      |
|----------------|----------|------|
| MRPL12         | 1,90E-11 | 2,28 |
| NUP155         | 6,61E-10 | 2,27 |
| SPINK1         | 1,28E-02 | 2,27 |
| ACTL6A         | 3,07E-06 | 2,27 |
| TPX2           | 2,45E-08 | 2,26 |
| SFRP2          | 2,25E-03 | 2,26 |
| CST1           | 3,64E-04 | 2,26 |
| HIST1H2BH      | 5,37E-07 | 2,25 |
| MAGEA9B        | 7,16E-03 | 2,25 |
| STX1A          | 9,33E-07 | 2,25 |
| THOC3          | 1,54E-06 | 2,25 |
| CHEK1          | 4,46E-09 | 2,25 |
| RPS15          | 1,71E-06 | 2,25 |
| BXDC2          | 3,45E-07 | 2,25 |
| IRF6           | 3,67E-05 | 2,24 |
| C15ORF48       | 1,53E-04 | 2,24 |
| LSR            | 2,31E-05 | 2,24 |
| SPTBN2         | 1,18E-09 | 2,23 |
| PKP3           | 2,05E-05 | 2,23 |
| DTYMK          | 2,44E-11 | 2,22 |
| GCNT3          | 1,25E-03 | 2,22 |
| COMP           | 2,26E-03 | 2,22 |
| BCL11A         | 2,32E-04 | 2,22 |
| MSTO1          | 1,46E-12 | 2,22 |
| MRPS12         | 3,60E-09 | 2,21 |
| LAPTM4B        | 7,22E-06 | 2,21 |
| KIF26B         | 9,81E-10 | 2,21 |
| NDRG1          | 4,18E-06 | 2,20 |
| CRKRS          | 7,97E-05 | 2,20 |
| C6ORF129       | 1,62E-15 | 2,20 |
| DERL3          | 5,19E-07 | 2,20 |
| KIAA1199       | 1,48E-04 | 2,19 |
| RANBP1         | 5,66E-07 | 2,19 |
| ITM2C          | 1,13E-07 | 2,19 |
| CXCL6          | 3,49E-03 | 2,19 |
| LAGE3          | 2,49E-10 | 2,19 |
| TCN1           | 8,37E-03 | 2,19 |
| SOX4           | 1,83E-08 | 2,19 |
| SLC7A5         | 3,56E-05 | 2,19 |
| PTPRZ1         | 2,08E-03 | 2,19 |
| IDH2           | 1,54E-09 | 2,19 |
| SPRR2A         | 7,67E-03 | 2,19 |
| SPRR2D         | 1,34E-02 | 2,18 |
| FKBP11         | 1,40E-06 | 2,18 |
| TPD52L1        | 4,74E-05 | 2,18 |
| RAD54L         | 1,81E-09 | 2,18 |
| WFDC3          | 9,23E-04 | 2,18 |
| HIST1H1C       | 7,03E-06 | 2,18 |
| NP_001017964,1 | 1,65E-09 | 2,17 |
| CDC2           | 3,06E-07 | 2,16 |
| CCNE2          | 5,70E-08 | 2,16 |
| OCIAD2         | 5,48E-07 | 2,16 |
| Q4KMW4_HUMAN   | 7,96E-06 | 2,16 |
| BARX1          | 7,67E-04 | 2,16 |

|             |          |      |
|-------------|----------|------|
| CKAP4       | 8,35E-10 | 2,16 |
| NUDT1       | 1,91E-09 | 2,15 |
| HMMR        | 8,53E-09 | 2,15 |
| FNDC1       | 4,69E-06 | 2,15 |
| GINS2       | 4,37E-06 | 2,15 |
| SRM         | 1,16E-05 | 2,15 |
| PIM2        | 2,64E-04 | 2,15 |
| ADH7        | 4,37E-02 | 2,14 |
| RPL22L1     | 1,48E-07 | 2,14 |
| EXOSC4      | 4,68E-10 | 2,14 |
| TUBG1       | 4,60E-08 | 2,13 |
| TMPRSS11E2  | 1,09E-03 | 2,13 |
| SESN3       | 4,63E-04 | 2,13 |
| ATAD2       | 3,67E-09 | 2,13 |
| KIFC1_HUMAN | 3,78E-07 | 2,13 |
| MARCKSL1    | 3,85E-07 | 2,12 |
| EEF1A2      | 8,01E-03 | 2,12 |
| TNC         | 2,23E-04 | 2,12 |
| JUP         | 1,65E-04 | 2,12 |
| BTBD11      | 2,11E-06 | 2,12 |
| CLDN10      | 1,72E-03 | 2,12 |
| COL17A1     | 2,22E-04 | 2,11 |
| SLC25A10    | 1,24E-06 | 2,11 |
| NDUFA4L2    | 3,49E-03 | 2,11 |
| PPIF        | 1,20E-08 | 2,11 |
| ALPK2       | 1,55E-06 | 2,11 |
| CDCA4       | 3,58E-08 | 2,11 |
| MTHFD2      | 1,66E-07 | 2,10 |
| CLDN1       | 1,53E-02 | 2,10 |
| CKS2        | 4,58E-06 | 2,10 |
| C4ORF7      | 1,79E-02 | 2,10 |
| C6ORF125    | 1,56E-10 | 2,10 |
| GCLM        | 1,83E-03 | 2,10 |
| CDCA5       | 9,55E-10 | 2,10 |
| HS3ST3A1    | 1,44E-05 | 2,10 |
| RGS17       | 6,83E-05 | 2,09 |
| PSMD2       | 1,38E-06 | 2,09 |
| GMPS        | 5,48E-08 | 2,09 |
| RPP40       | 2,67E-08 | 2,09 |
| ABCC5       | 1,87E-04 | 2,09 |
| MTP18_HUMAN | 1,04E-09 | 2,08 |
| MRPS17      | 1,90E-08 | 2,08 |
| SLC39A14    | 4,70E-08 | 2,08 |
| CD24L4      | 1,56E-04 | 2,08 |
| DKC1        | 3,06E-10 | 2,08 |
| SLC9A3R1    | 2,75E-04 | 2,08 |
| TMEM79      | 1,89E-06 | 2,08 |
| DNAJB11     | 4,09E-10 | 2,08 |
| FEN1        | 9,76E-11 | 2,07 |
| TMEM45A     | 2,87E-04 | 2,07 |
| CARM1       | 6,63E-08 | 2,07 |
| SGPL1       | 1,31E-15 | 2,07 |
| HIST1H2AB   | 2,87E-07 | 2,07 |
| MLZE        | 8,39E-05 | 2,07 |

|             |          |      |
|-------------|----------|------|
| C3ORF21     | 1,48E-06 | 2,07 |
| ADM         | 6,28E-04 | 2,07 |
| EYA2        | 9,16E-05 | 2,06 |
| POLE2       | 1,52E-08 | 2,06 |
| SLC4A11     | 1,53E-04 | 2,06 |
| PTTG3       | 2,23E-07 | 2,06 |
| CHSS2_HUMAN | 2,25E-06 | 2,06 |
| TRIM29      | 2,26E-03 | 2,06 |
| CD27        | 2,41E-03 | 2,06 |
| FGFBP1      | 4,44E-02 | 2,06 |
| FAM83A      | 7,37E-04 | 2,05 |
| TMEM14A     | 2,24E-04 | 2,05 |
| HELLS       | 2,52E-08 | 2,05 |
| JSRP1       | 1,47E-05 | 2,05 |
| HSPB1       | 2,19E-03 | 2,04 |
| DSC2        | 1,90E-03 | 2,04 |
| ABCA12      | 5,97E-06 | 2,04 |
| CDT1        | 4,13E-07 | 2,04 |
| SRPRB       | 3,08E-14 | 2,04 |
| LOX         | 8,48E-07 | 2,03 |
| DDX39       | 3,70E-11 | 2,03 |
| RAB26       | 4,05E-09 | 2,03 |
| MAGED1      | 1,57E-07 | 2,03 |
| FAM83H      | 1,07E-04 | 2,03 |
| FAM57A      | 5,38E-08 | 2,03 |
| CSTF2       | 2,04E-11 | 2,03 |
| PLOD1       | 4,68E-07 | 2,03 |
| ENO2        | 1,15E-05 | 2,03 |
| WNT5B       | 3,95E-06 | 2,03 |
| ARHGEF19    | 4,32E-09 | 2,02 |
| RGMA        | 1,21E-03 | 2,02 |
| C17ORF53    | 1,40E-07 | 2,02 |
| PKM2        | 3,07E-05 | 2,02 |
| FST         | 3,89E-03 | 2,02 |
| DDR1_HUMAN  | 2,26E-05 | 2,01 |
| XTP3A_HUMAN | 2,12E-08 | 2,01 |
| C16ORF33    | 5,67E-09 | 2,01 |

**Table 4 Processes up regulated in cancer versus cancer-free tissue**

| Genes                    | NGR        | NG      | Hyp         | Hyp*        | Annotations                                                                                                                               |
|--------------------------|------------|---------|-------------|-------------|-------------------------------------------------------------------------------------------------------------------------------------------|
| <a href="#">32 genes</a> | 191(29095) | 32(378) | 4.29289e-26 | 8.80042e-24 | <a href="#">GO:0007067</a> :mitosis (BP)                                                                                                  |
| <a href="#">32 genes</a> | 240(29095) | 32(378) | 6.51952e-23 | 6.68251e-21 | <a href="#">GO:0051301</a> :cell division (BP)                                                                                            |
| <a href="#">41 genes</a> | 459(29095) | 41(378) | 2.66984e-22 | 1.82439e-20 | <a href="#">GO:0007049</a> :cell cycle (BP)                                                                                               |
| <a href="#">26 genes</a> | 162(29095) | 26(378) | 6.39059e-21 | 3.27518e-19 | <a href="#">GO:0007067</a> :mitosis (BP)<br><a href="#">GO:0007049</a> :cell cycle (BP)                                                   |
| <a href="#">25 genes</a> | 155(29095) | 25(378) | 3.22944e-20 | 1.32407e-18 | <a href="#">GO:0007067</a> :mitosis (BP)<br><a href="#">GO:0051301</a> :cell division (BP)                                                |
| <a href="#">28 genes</a> | 223(29095) | 28(378) | 1.78282e-19 | 6.09131e-18 | <a href="#">GO:0007049</a> :cell cycle (BP)<br><a href="#">GO:0051301</a> :cell division (BP)                                             |
| <a href="#">23 genes</a> | 151(29095) | 23(378) | 4.01804e-18 | 1.17671e-16 | <a href="#">GO:0007067</a> :mitosis (BP)<br><a href="#">GO:0007049</a> :cell cycle (BP)<br><a href="#">GO:0051301</a> :cell division (BP) |
| <a href="#">14 genes</a> | 81(29095)  | 14(378) | 2.54768e-12 | 6.52843e-11 | <a href="#">GO:0008544</a> :epidermis development (BP)                                                                                    |
| <a href="#">16 genes</a> | 146(29095) | 16(378) | 9.00685e-11 | 2.05156e-09 | <a href="#">GO:0006260</a> :DNA replication (BP)                                                                                          |
| <a href="#">7 genes</a>  | 13(29095)  | 7(378)  | 9.48516e-11 | 1.94446e-09 | <a href="#">GO:0007051</a> :spindle organization (BP)                                                                                     |
| <a href="#">6 genes</a>  | 9(29095)   | 6(378)  | 3.75723e-10 | 7.00212e-09 | <a href="#">GO:0007049</a> :cell cycle (BP)<br><a href="#">GO:0007051</a> :spindle organization (BP)                                      |

|                          |            |         |             |             |                                                                                                                                                                                   |
|--------------------------|------------|---------|-------------|-------------|-----------------------------------------------------------------------------------------------------------------------------------------------------------------------------------|
| <a href="#">5 genes</a>  | 7(29095)   | 5(378)  | 7.4109e-09  | 1.16864e-07 | <a href="#">GO:0007067</a> :mitosis (BP)<br><a href="#">GO:0007049</a> :cell cycle (BP)<br><a href="#">GO:0007051</a> :spindle organization (BP)                                  |
| <a href="#">5 genes</a>  | 7(29095)   | 5(378)  | 7.4109e-09  | 1.16864e-07 | <a href="#">GO:0007049</a> :cell cycle (BP)<br><a href="#">GO:0048015</a> :phosphoinositide-mediated signaling (BP)<br><a href="#">GO:0007051</a> :spindle organization (BP)      |
| <a href="#">8 genes</a>  | 35(29095)  | 8(378)  | 1.30619e-08 | 1.91264e-07 | <a href="#">GO:0048015</a> :phosphoinositide-mediated signaling (BP)                                                                                                              |
| <a href="#">5 genes</a>  | 8(29095)   | 5(378)  | 1.95514e-08 | 2.50502e-07 | <a href="#">GO:0001568</a> :blood vessel development (BP)<br><a href="#">GO:0030199</a> :collagen fibril organization (BP)                                                        |
| <a href="#">5 genes</a>  | 8(29095)   | 5(378)  | 1.95514e-08 | 2.50502e-07 | <a href="#">GO:0007049</a> :cell cycle (BP)<br><a href="#">GO:0051301</a> :cell division (BP)<br><a href="#">GO:0007051</a> :spindle organization (BP)                            |
| <a href="#">23 genes</a> | 452(29095) | 23(378) | 3.40935e-08 | 4.11127e-07 | <a href="#">GO:0006915</a> :apoptosis (BP)                                                                                                                                        |
| <a href="#">6 genes</a>  | 18(29095)  | 6(378)  | 7.5204e-08  | 8.5649e-07  | <a href="#">GO:0051301</a> :cell division (BP)<br><a href="#">GO:0031145</a> :anaphase-promoting complex-dependent proteasomal ubiquitin-dependent protein catabolic process (BP) |
| <a href="#">5 genes</a>  | 10(29095)  | 5(378)  | 8.61128e-08 | 9.29111e-07 | <a href="#">GO:0007067</a> :mitosis (BP)<br><a href="#">GO:0007018</a> :microtubule-based movement (BP)                                                                           |
| <a href="#">4 genes</a>  | 5(29095)   | 4(378)  | 1.38787e-07 | 1.42257e-06 | <a href="#">GO:0007067</a> :mitosis (BP)<br><a href="#">GO:0007049</a> :cell cycle (BP)                                                                                           |



|                         |           |        |             |             |                                                                                                                                                                                                                                |
|-------------------------|-----------|--------|-------------|-------------|--------------------------------------------------------------------------------------------------------------------------------------------------------------------------------------------------------------------------------|
|                         |           |        |             |             | <a href="#">GO:0048015</a> :phosphoinositide-mediated signaling (BP)<br><a href="#">GO:0007051</a> :spindle organization (BP)                                                                                                  |
| <a href="#">7 genes</a> | 34(29095) | 7(378) | 2.35058e-07 | 2.29461e-06 | <a href="#">GO:0030216</a> :keratinocyte differentiation (BP)                                                                                                                                                                  |
| <a href="#">6 genes</a> | 22(29095) | 6(378) | 2.89261e-07 | 2.69539e-06 | <a href="#">GO:0007067</a> :mitosis (BP)<br><a href="#">GO:0006468</a> :protein amino acid phosphorylation (BP)                                                                                                                |
| <a href="#">4 genes</a> | 6(29095)  | 4(378) | 4.1208e-07  | 3.51985e-06 | <a href="#">GO:0007067</a> :mitosis (BP)<br><a href="#">GO:0007049</a> :cell cycle (BP)<br><a href="#">GO:0051301</a> :cell division (BP)<br><a href="#">GO:0007051</a> :spindle organization (BP)                             |
| <a href="#">4 genes</a> | 6(29095)  | 4(378) | 4.1208e-07  | 3.51985e-06 | <a href="#">GO:0007049</a> :cell cycle (BP)<br><a href="#">GO:0051301</a> :cell division (BP)<br><a href="#">GO:0048015</a> :phosphoinositide-mediated signaling (BP)<br><a href="#">GO:0007051</a> :spindle organization (BP) |
| <a href="#">6 genes</a> | 25(29095) | 6(378) | 6.6433e-07  | 5.44751e-06 | <a href="#">GO:0030199</a> :collagen fibril organization (BP)                                                                                                                                                                  |
| <a href="#">4 genes</a> | 7(29095)  | 4(378) | 9.51639e-07 | 7.50331e-06 | <a href="#">GO:0007067</a> :mitosis (BP)<br><a href="#">GO:0051301</a> :cell division (BP)<br><a href="#">GO:0007076</a> :mitotic chromosome condensation (BP)                                                                 |
| <a href="#">7 genes</a> | 42(29095) | 7(378) | 1.07803e-06 | 8.18504e-06 | <a href="#">GO:0006096</a> :glycolysis (BP)                                                                                                                                                                                    |
| <a href="#">6 genes</a> | 27(29095) | 6(378) | 1.08627e-06 | 7.95303e-06 | <a href="#">GO:0006508</a> :proteolysis (BP)<br><a href="#">GO:0008152</a> :metabolic process (BP)                                                                                                                             |

|                          |            |         |             |             |                                                                                                                                                                                                                                        |
|--------------------------|------------|---------|-------------|-------------|----------------------------------------------------------------------------------------------------------------------------------------------------------------------------------------------------------------------------------------|
| <a href="#">22 genes</a> | 512(29095) | 22(378) | 1.19441e-06 | 8.44323e-06 | <a href="#">GO:0007155</a> :cell adhesion (BP)                                                                                                                                                                                         |
| <a href="#">4 genes</a>  | 8(29095)   | 4(378)  | 1.88373e-06 | 1.28721e-05 | <a href="#">GO:0007049</a> :cell cycle (BP)<br><a href="#">GO:0051301</a> :cell division (BP)<br><a href="#">GO:0007093</a> :mitotic cell cycle checkpoint (BP)                                                                        |
| <a href="#">5 genes</a>  | 17(29095)  | 5(378)  | 1.9617e-06  | 1.25671e-05 | <a href="#">GO:0008544</a> :epidermis development (BP)<br><a href="#">GO:0030216</a> :keratinocyte differentiation (BP)                                                                                                                |
| <a href="#">5 genes</a>  | 17(29095)  | 5(378)  | 1.9617e-06  | 1.25671e-05 | <a href="#">GO:0007049</a> :cell cycle (BP)<br><a href="#">GO:0051301</a> :cell division (BP)<br><a href="#">GO:0031145</a> :anaphase-promoting complex-dependent proteasomal ubiquitin-dependent protein catabolic process (BP)       |
| <a href="#">3 genes</a>  | 3(29095)   | 3(378)  | 2.17576e-06 | 1.17376e-05 | <a href="#">GO:0001501</a> :skeletal system development (BP)<br><a href="#">GO:0043589</a> :skin morphogenesis (BP)                                                                                                                    |
| <a href="#">3 genes</a>  | 3(29095)   | 3(378)  | 2.17576e-06 | 1.17376e-05 | <a href="#">GO:0007067</a> :mitosis (BP)<br><a href="#">GO:0007049</a> :cell cycle (BP)<br><a href="#">GO:0006468</a> :protein amino acid phosphorylation (BP)<br><a href="#">GO:0034501</a> :protein localization to kinetochore (BP) |
| <a href="#">3 genes</a>  | 3(29095)   | 3(378)  | 2.17576e-06 | 1.17376e-05 | <a href="#">GO:0001568</a> :blood vessel development (BP)<br><a href="#">GO:0030199</a> :collagen fibril organization (BP)<br><a href="#">GO:0032964</a> :collagen biosynthetic process (BP)                                           |
| <a href="#">3 genes</a>  | 3(29095)   | 3(378)  | 2.17576e-06 | 1.17376e-05 | <a href="#">GO:0006468</a> :protein amino acid phosphorylation (BP)                                                                                                                                                                    |

|                          |            |         |             |             |                                                                                                                                                                |
|--------------------------|------------|---------|-------------|-------------|----------------------------------------------------------------------------------------------------------------------------------------------------------------|
|                          |            |         |             |             | <a href="#">GO:0007051</a> :spindle organization (BP)                                                                                                          |
| <a href="#">3 genes</a>  | 3(29095)   | 3(378)  | 2.17576e-06 | 1.17376e-05 | <a href="#">GO:0007052</a> :mitotic spindle organization (BP)<br><a href="#">GO:0007051</a> :spindle organization (BP)                                         |
| <a href="#">3 genes</a>  | 3(29095)   | 3(378)  | 2.17576e-06 | 1.17376e-05 | <a href="#">GO:0006915</a> :apoptosis (BP)<br><a href="#">GO:0008152</a> :metabolic process (BP)                                                               |
| <a href="#">9 genes</a>  | 89(29095)  | 9(378)  | 2.44115e-06 | 1.28317e-05 | <a href="#">GO:0007018</a> :microtubule-based movement (BP)                                                                                                    |
| <a href="#">5 genes</a>  | 18(29095)  | 5(378)  | 2.68728e-06 | 1.37723e-05 | <a href="#">GO:0006508</a> :proteolysis (BP)<br><a href="#">GO:0030574</a> :collagen catabolic process (BP)                                                    |
| <a href="#">5 genes</a>  | 20(29095)  | 5(378)  | 4.75972e-06 | 2.37986e-05 | <a href="#">GO:0007067</a> :mitosis (BP)<br><a href="#">GO:0007049</a> :cell cycle (BP)<br><a href="#">GO:0006468</a> :protein amino acid phosphorylation (BP) |
| <a href="#">12 genes</a> | 182(29095) | 12(378) | 5.11292e-06 | 2.49559e-05 | <a href="#">GO:0006916</a> :anti-apoptosis (BP)                                                                                                                |

**Table 5 Processes down regulated in NSCLC versus cancer-free normal tissue**

| <b>Genes</b>             | <b>NGR</b>  | <b>NG</b> | <b>Hyp</b>  | <b>Hyp*</b> | <b>Annotations</b>                                                              |
|--------------------------|-------------|-----------|-------------|-------------|---------------------------------------------------------------------------------|
| <a href="#">25 genes</a> | 227(29095)  | 25(544)   | 1.41322e-12 | 4.93214e-10 | <a href="#">GO:0006954</a> :inflammatory response (BP)                          |
| <a href="#">76 genes</a> | 1871(29095) | 76(544)   | 1.50838e-10 | 2.63212e-08 | <a href="#">GO:0007165</a> :signal transduction (BP)                            |
| <a href="#">19 genes</a> | 164(29095)  | 19(544)   | 2.92379e-10 | 3.40134e-08 | <a href="#">GO:0007166</a> :cell surface receptor linked signaling pathway (BP) |
| <a href="#">32 genes</a> | 512(29095)  | 32(544)   | 3.49252e-09 | 3.04723e-07 | <a href="#">GO:0007155</a> :cell adhesion (BP)                                  |

|                          |            |         |             |             |                                                                                                                                                                          |
|--------------------------|------------|---------|-------------|-------------|--------------------------------------------------------------------------------------------------------------------------------------------------------------------------|
| <a href="#">31 genes</a> | 531(29095) | 31(544) | 2.96388e-08 | 2.06879e-06 | <a href="#">GO:0055114</a> :oxidation reduction (BP)                                                                                                                     |
| <a href="#">13 genes</a> | 99(29095)  | 13(544) | 4.22677e-08 | 2.45857e-06 | <a href="#">GO:0045087</a> :innate immune response (BP)                                                                                                                  |
| <a href="#">8 genes</a>  | 29(29095)  | 8(544)  | 4.31052e-08 | 2.1491e-06  | <a href="#">GO:0006958</a> :complement activation, classical pathway (BP)                                                                                                |
| <a href="#">6 genes</a>  | 17(29095)  | 6(544)  | 4.31769e-07 | 1.88359e-05 | <a href="#">GO:0045087</a> :innate immune response (BP)<br><a href="#">GO:0006958</a> :complement activation, classical pathway (BP)                                     |
| <a href="#">26 genes</a> | 459(29095) | 26(544) | 6.88845e-07 | 2.67119e-05 | <a href="#">GO:0006955</a> :immune response (BP)                                                                                                                         |
| <a href="#">6 genes</a>  | 19(29095)  | 6(544)  | 9.16902e-07 | 3.19999e-05 | <a href="#">GO:0019370</a> :leukotriene biosynthetic process (BP)                                                                                                        |
| <a href="#">7 genes</a>  | 30(29095)  | 7(544)  | 1.07754e-06 | 3.41874e-05 | <a href="#">GO:0009612</a> :response to mechanical stimulus (BP)                                                                                                         |
| <a href="#">9 genes</a>  | 58(29095)  | 9(544)  | 1.2331e-06  | 3.31041e-05 | <a href="#">GO:0051384</a> :response to glucocorticoid stimulus (BP)                                                                                                     |
| <a href="#">9 genes</a>  | 58(29095)  | 9(544)  | 1.2331e-06  | 3.31041e-05 | <a href="#">GO:0007165</a> :signal transduction (BP)<br><a href="#">GO:0007166</a> :cell surface receptor linked signaling pathway (BP)                                  |
| <a href="#">5 genes</a>  | 12(29095)  | 5(544)  | 1.59414e-06 | 3.97395e-05 | <a href="#">GO:0045730</a> :respiratory burst (BP)                                                                                                                       |
| <a href="#">4 genes</a>  | 6(29095)   | 4(544)  | 1.75999e-06 | 4.09492e-05 | <a href="#">GO:0007186</a> :G-protein coupled receptor protein signaling pathway (BP)<br><a href="#">GO:0006898</a> :receptor-mediated endocytosis (BP)                  |
| <a href="#">5 genes</a>  | 13(29095)  | 5(544)  | 2.55059e-06 | 5.56348e-05 | <a href="#">GO:0010744</a> :positive regulation of macrophage derived foam cell differentiation (BP)                                                                     |
| <a href="#">38 genes</a> | 898(29095) | 38(544) | 3.03717e-06 | 6.23513e-05 | <a href="#">GO:0007275</a> :multicellular organismal development (BP)                                                                                                    |
| <a href="#">6 genes</a>  | 23(29095)  | 6(544)  | 3.20112e-06 | 6.20661e-05 | <a href="#">GO:0007186</a> :G-protein coupled receptor protein signaling pathway (BP)<br><a href="#">GO:0007166</a> :cell surface receptor linked signaling pathway (BP) |

|                         |           |        |             |             |                                                                                                                                                                                                                                    |
|-------------------------|-----------|--------|-------------|-------------|------------------------------------------------------------------------------------------------------------------------------------------------------------------------------------------------------------------------------------|
| <a href="#">4 genes</a> | 7(29095)  | 4(544) | 4.04574e-06 | 7.43139e-05 | <a href="#">GO:0042493</a> :response to drug (BP)<br><a href="#">GO:0032570</a> :response to progesterone stimulus (BP)<br><a href="#">GO:0009612</a> :response to mechanical stimulus (BP)                                        |
| <a href="#">9 genes</a> | 67(29095) | 9(544) | 4.2657e-06  | 7.44365e-05 | <a href="#">GO:0016337</a> :cell-cell adhesion (BP)                                                                                                                                                                                |
| <a href="#">3 genes</a> | 3(29095)  | 3(544) | 6.50111e-06 | 9.86473e-05 | <a href="#">GO:0007186</a> :G-protein coupled receptor protein signaling pathway (BP)<br><a href="#">GO:0007166</a> :cell surface receptor linked signaling pathway (BP)<br><a href="#">GO:0030593</a> :neutrophil chemotaxis (BP) |
| <a href="#">3 genes</a> | 3(29095)  | 3(544) | 6.50111e-06 | 9.86473e-05 | <a href="#">GO:0043065</a> :positive regulation of apoptosis (BP)<br><a href="#">GO:0006979</a> :response to oxidative stress (BP)<br><a href="#">GO:0032355</a> :response to estradiol stimulus (BP)                              |
| <a href="#">3 genes</a> | 3(29095)  | 3(544) | 6.50111e-06 | 9.86473e-05 | <a href="#">GO:0010552</a> :positive regulation of gene-specific transcription from RNA polymerase II promoter (BP)<br><a href="#">GO:0006644</a> :phospholipid metabolic process (BP)                                             |
| <a href="#">8 genes</a> | 54(29095) | 8(544) | 6.93242e-06 | 0.000100809 | <a href="#">GO:0032355</a> :response to estradiol stimulus (BP)                                                                                                                                                                    |
| <a href="#">5 genes</a> | 16(29095) | 5(544) | 8.26321e-06 | 0.000115354 | <a href="#">GO:0001937</a> :negative regulation of endothelial cell proliferation (BP)                                                                                                                                             |
| <a href="#">7 genes</a> | 41(29095) | 7(544) | 9.96006e-06 | 0.000133695 | <a href="#">GO:0006898</a> :receptor-mediated endocytosis (BP)                                                                                                                                                                     |
| <a href="#">5 genes</a> | 17(29095) | 5(544) | 1.15263e-05 | 0.000148988 | <a href="#">GO:0032870</a> :cellular response to hormone stimulus (BP)                                                                                                                                                             |
| <a href="#">6 genes</a> | 29(29095) | 6(544) | 1.36943e-05 | 0.000170689 | <a href="#">GO:0007585</a> :respiratory gaseous exchange (BP)                                                                                                                                                                      |
| <a href="#">5 genes</a> | 18(29095) | 5(544) | 1.57143e-05 | 0.000189114 | <a href="#">GO:0030593</a> :neutrophil chemotaxis (BP)                                                                                                                                                                             |

|                          |            |         |             |             |                                                                                                                                                                                                                                                                                                                                                          |
|--------------------------|------------|---------|-------------|-------------|----------------------------------------------------------------------------------------------------------------------------------------------------------------------------------------------------------------------------------------------------------------------------------------------------------------------------------------------------------|
| <a href="#">4 genes</a>  | 10(29095)  | 4(544)  | 2.32115e-05 | 0.000270028 | <a href="#">GO:0007186</a> :G-protein coupled receptor protein signaling pathway (BP)<br><a href="#">GO:0006954</a> :inflammatory response (BP)<br><a href="#">GO:0007166</a> :cell surface receptor linked signaling pathway (BP)                                                                                                                       |
| <a href="#">17 genes</a> | 280(29095) | 17(544) | 2.42188e-05 | 0.000272657 | <a href="#">GO:0008284</a> :positive regulation of cell proliferation (BP)                                                                                                                                                                                                                                                                               |
| <a href="#">3 genes</a>  | 4(29095)   | 3(544)  | 2.56418e-05 | 0.000235499 | <a href="#">GO:0007507</a> :heart development (BP)<br><a href="#">GO:0001569</a> :patterning of blood vessels (BP)<br><a href="#">GO:0001666</a> :response to hypoxia (BP)                                                                                                                                                                               |
| <a href="#">3 genes</a>  | 4(29095)   | 3(544)  | 2.56418e-05 | 0.000235499 | <a href="#">GO:0007186</a> :G-protein coupled receptor protein signaling pathway (BP)<br><a href="#">GO:0008284</a> :positive regulation of cell proliferation (BP)<br><a href="#">GO:0007166</a> :cell surface receptor linked signaling pathway (BP)                                                                                                   |
| <a href="#">3 genes</a>  | 4(29095)   | 3(544)  | 2.56418e-05 | 0.000235499 | <a href="#">GO:0007204</a> :elevation of cytosolic calcium ion concentration (BP)<br><a href="#">GO:0042310</a> :vasoconstriction (BP)                                                                                                                                                                                                                   |
| <a href="#">3 genes</a>  | 4(29095)   | 3(544)  | 2.56418e-05 | 0.000235499 | <a href="#">GO:0010552</a> :positive regulation of gene-specific transcription from RNA polymerase II promoter (BP)<br><a href="#">GO:0001570</a> :vasculogenesis (BP)                                                                                                                                                                                   |
| <a href="#">3 genes</a>  | 4(29095)   | 3(544)  | 2.56418e-05 | 0.000235499 | <a href="#">GO:0007186</a> :G-protein coupled receptor protein signaling pathway (BP)<br><a href="#">GO:0007204</a> :elevation of cytosolic calcium ion concentration (BP)<br><a href="#">GO:0051482</a> :elevation of cytosolic calcium ion concentration during G-protein signaling, coupled to IP3 second messenger (phospholipase C activating) (BP) |

|                         |           |        |             |             |                                                                                                                                                                                     |
|-------------------------|-----------|--------|-------------|-------------|-------------------------------------------------------------------------------------------------------------------------------------------------------------------------------------|
| <a href="#">3 genes</a> | 4(29095)  | 3(544) | 2.56418e-05 | 0.000235499 | <a href="#">GO:0045944</a> :positive regulation of transcription from RNA polymerase II promoter (BP)<br><a href="#">GO:0051789</a> :response to protein stimulus (BP)              |
| <a href="#">3 genes</a> | 4(29095)  | 3(544) | 2.56418e-05 | 0.000235499 | <a href="#">GO:0010744</a> :positive regulation of macrophage derived foam cell differentiation (BP)<br><a href="#">GO:0010886</a> :positive regulation of cholesterol storage (BP) |
| <a href="#">5 genes</a> | 21(29095) | 5(544) | 3.56294e-05 | 0.000318837 | <a href="#">GO:0032570</a> :response to progesterone stimulus (BP)                                                                                                                  |
| <a href="#">6 genes</a> | 34(29095) | 6(544) | 3.58176e-05 | 0.000312509 | <a href="#">GO:0006959</a> :humoral immune response (BP)                                                                                                                            |
| <a href="#">4 genes</a> | 11(29095) | 4(544) | 3.59356e-05 | 0.000298608 | <a href="#">GO:0006935</a> :chemotaxis (BP)<br><a href="#">GO:0007166</a> :cell surface receptor linked signaling pathway (BP)                                                      |

**Figure 1** Heatmap with differentially expressed genes in NSCLC. Color on the heatmap depicts  $\log_2$ -expression value: red- high expression, green- low expression. Sidebar presents tissue type: blue – normal control, red – tumor tissue.

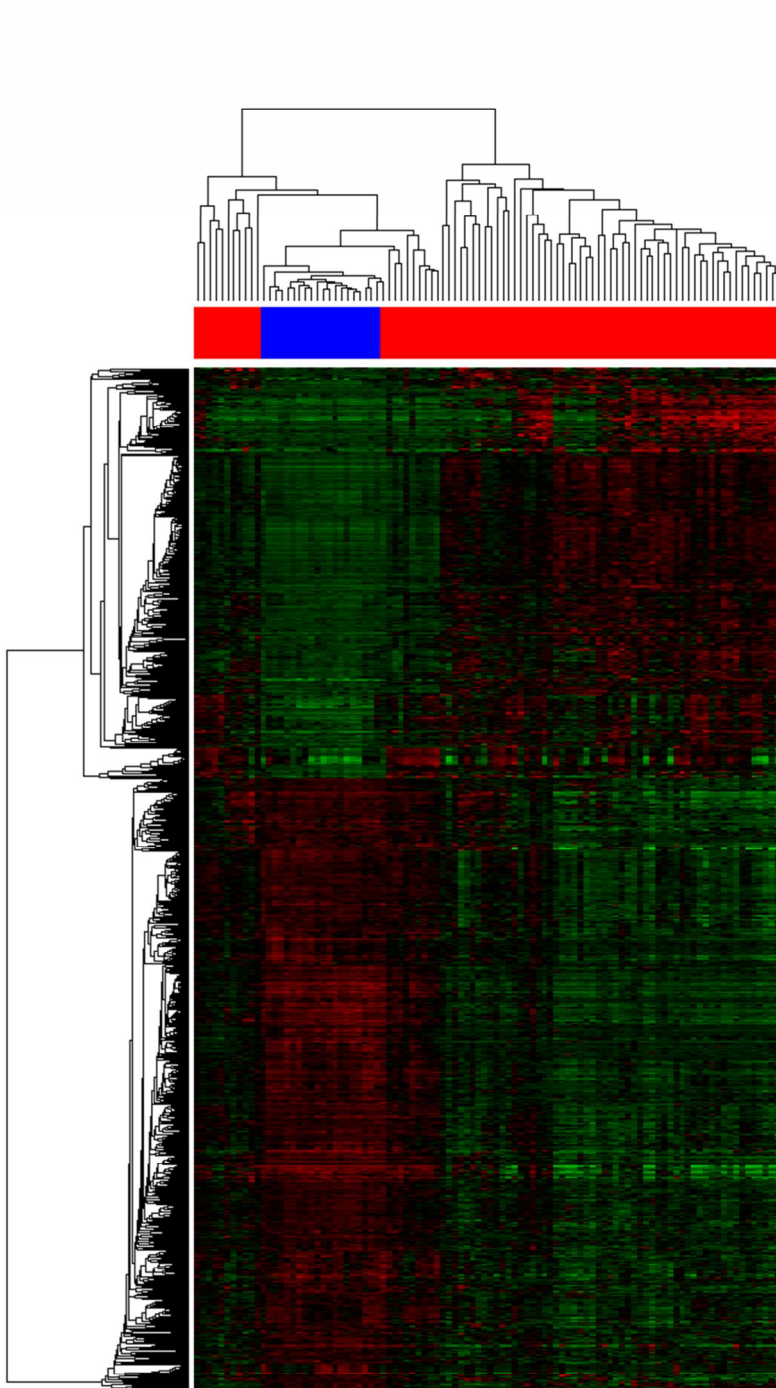



**Figure 2** Heatmap with differentially expressed genes between SCC and other subtypes. Color on the heatmap depicts  $\log_2$ -expression value: red- high expression, green- low expression. Sidebar presents different subtypes: red – SCC, pink – BAC, orange – AC.

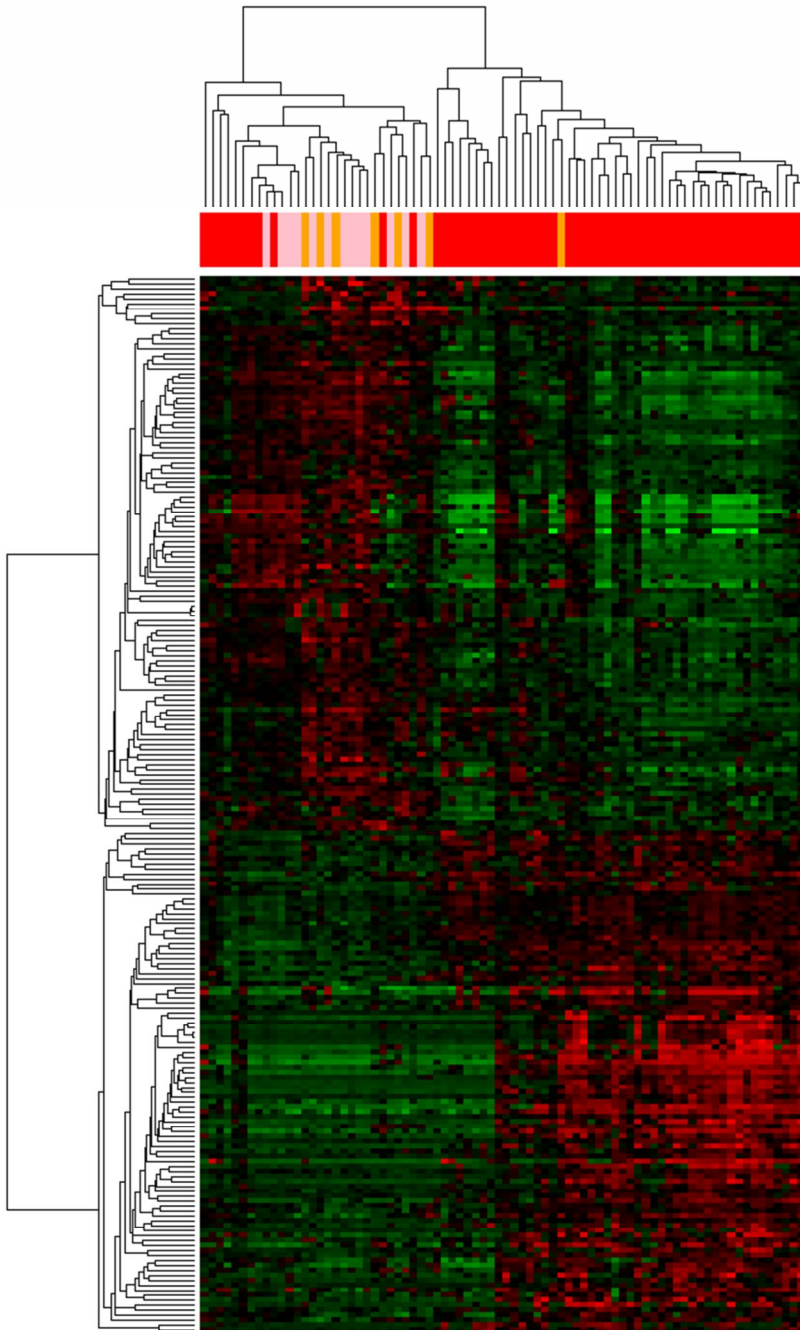

Supplement: CIN-1-2011-175-s001.pdf [file CIN-1-2011-175-s001.pdf]
